# Supplementary material for: Sequential Iron-Catalyzed C(sp2)–C(sp3) Cross-Coupling of Chlorobenzamides/Chemoselective Amide Reduction and Reductive Deuteration to Benzylic Alcohols
Source: MDPI journal article supplement (doi:10.3390/molecules28010223), 2022-12-27

# Sequential Iron-Catalyzed C(sp<sup>2</sup>)-C(sp<sup>3</sup>) Cross-Coupling of Chlorobenzamides/Chemoselective Amide Reduction and Reductive Deuteration to Benzylic Alcohols

Elwira Bisz<sup>1,\*</sup>, Pamela Podchorodecka<sup>1</sup>, Hengzhao Li<sup>2</sup>, Wioletta Ochędzan-Siodłak<sup>1</sup>, Jie An<sup>2,\*</sup> and Michal Szostak<sup>3,\*</sup>

<sup>1</sup>*Department of Chemistry, Opole University, 48 Oleska Street, 45-052 Opole, Poland*

<sup>2</sup>*Department of Nutrition and Health, China Agricultural University, Beijing 100193, China*

<sup>3</sup>*Department of Chemistry, Rutgers University, 73 Warren Street, Newark, NJ 07102, USA*

*ebisz@uni.opole.pl; jie\_an@cau.edu.cn; michal.szostak@rutgers.edu*

## Supporting Information

|                                                |    |
|------------------------------------------------|----|
| Table of Contents                              | S1 |
| <sup>1</sup> H and <sup>13</sup> C NMR Spectra | S2 |

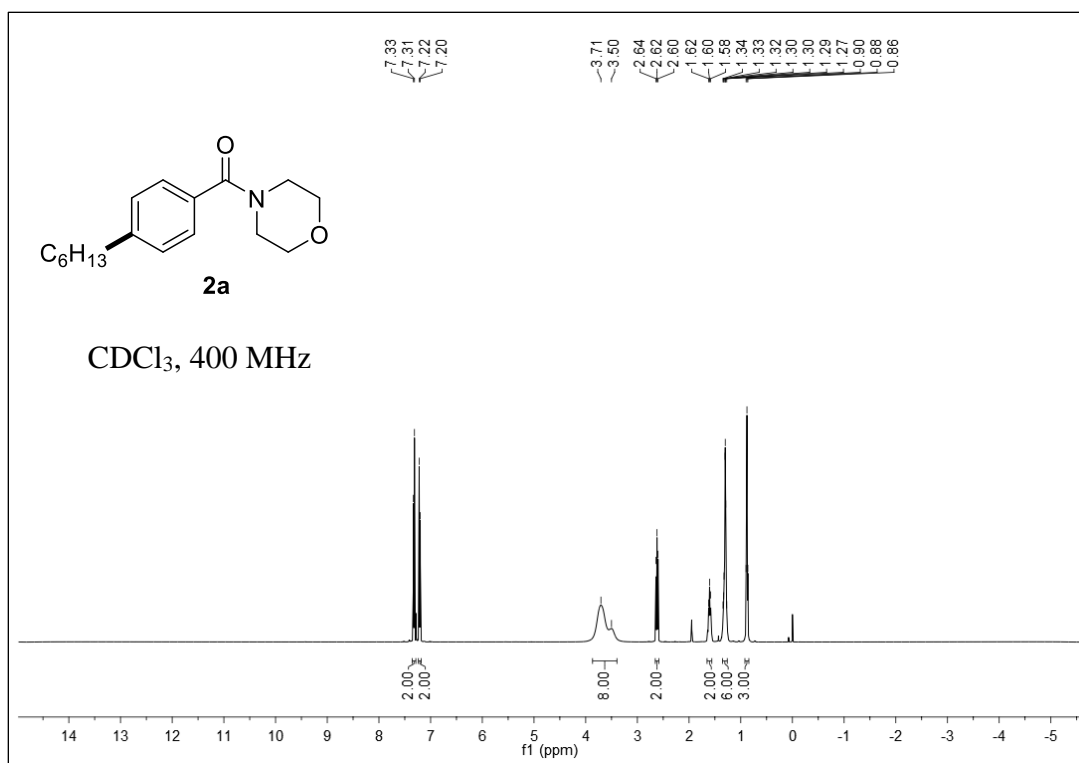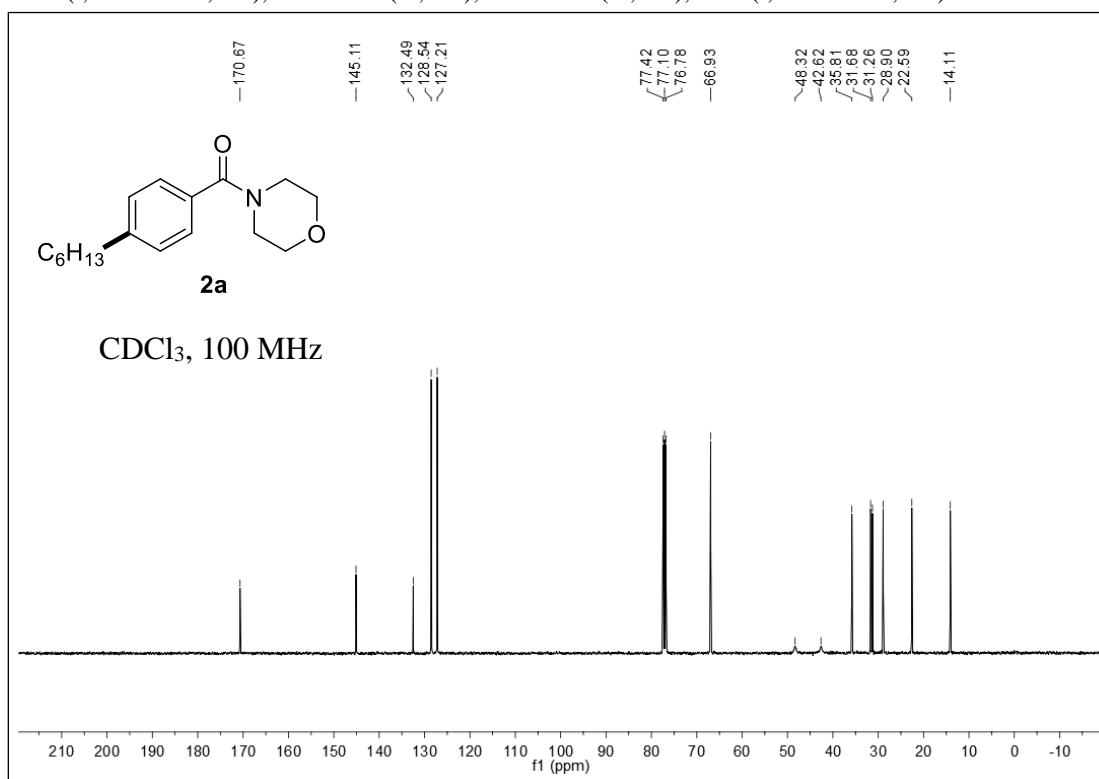

<sup>13</sup>C NMR (100 MHz, CDCl<sub>3</sub>) δ 170.67, 145.11, 132.49, 128.54, 127.21, 77.42, 77.10, 76.78, 66.93, 48.32, 42.62, 35.81, 31.68, 31.26, 28.90, 22.59, 14.11.

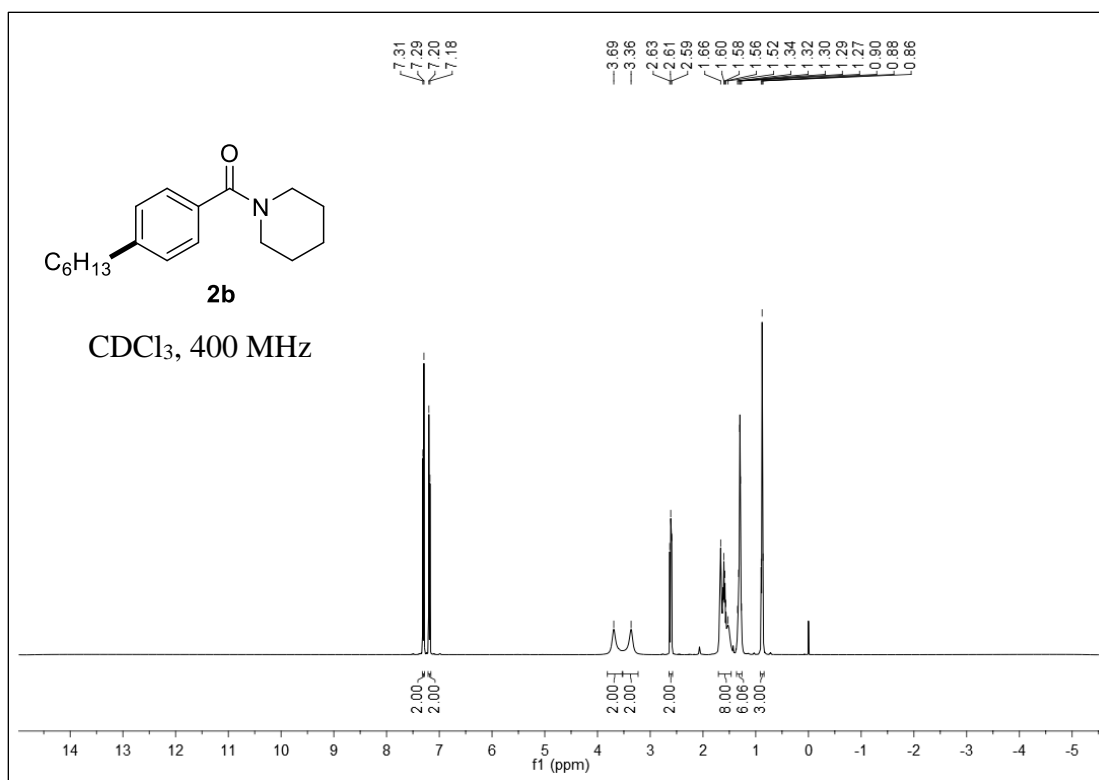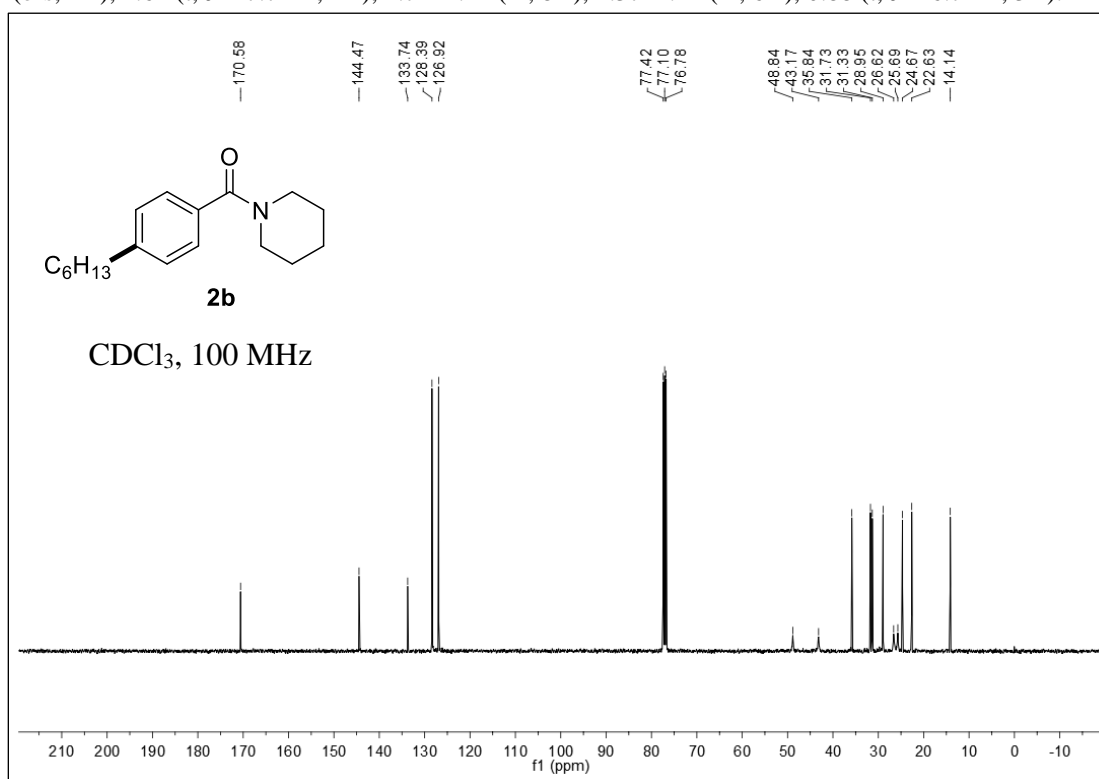

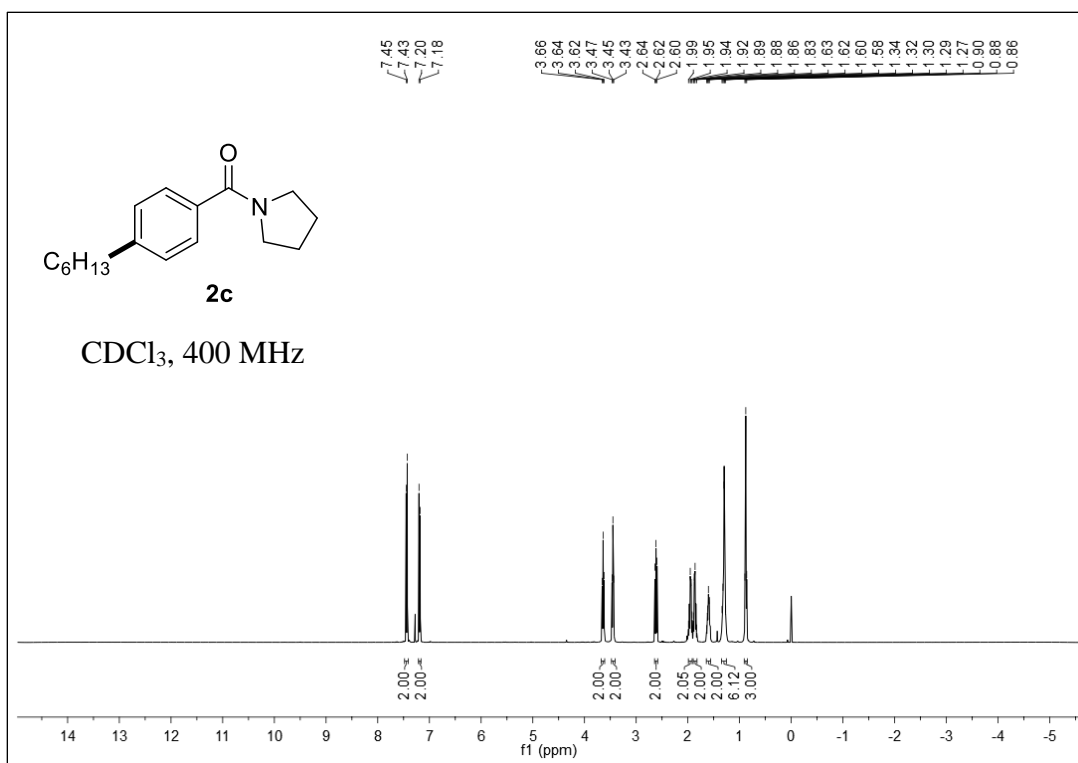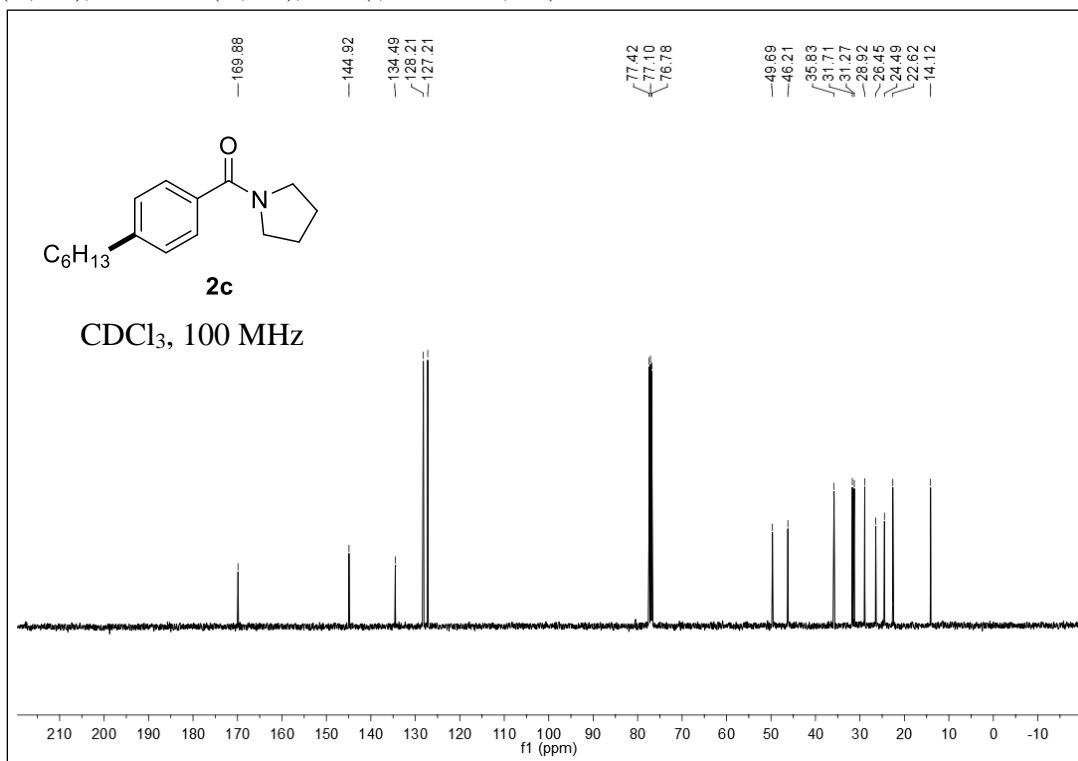

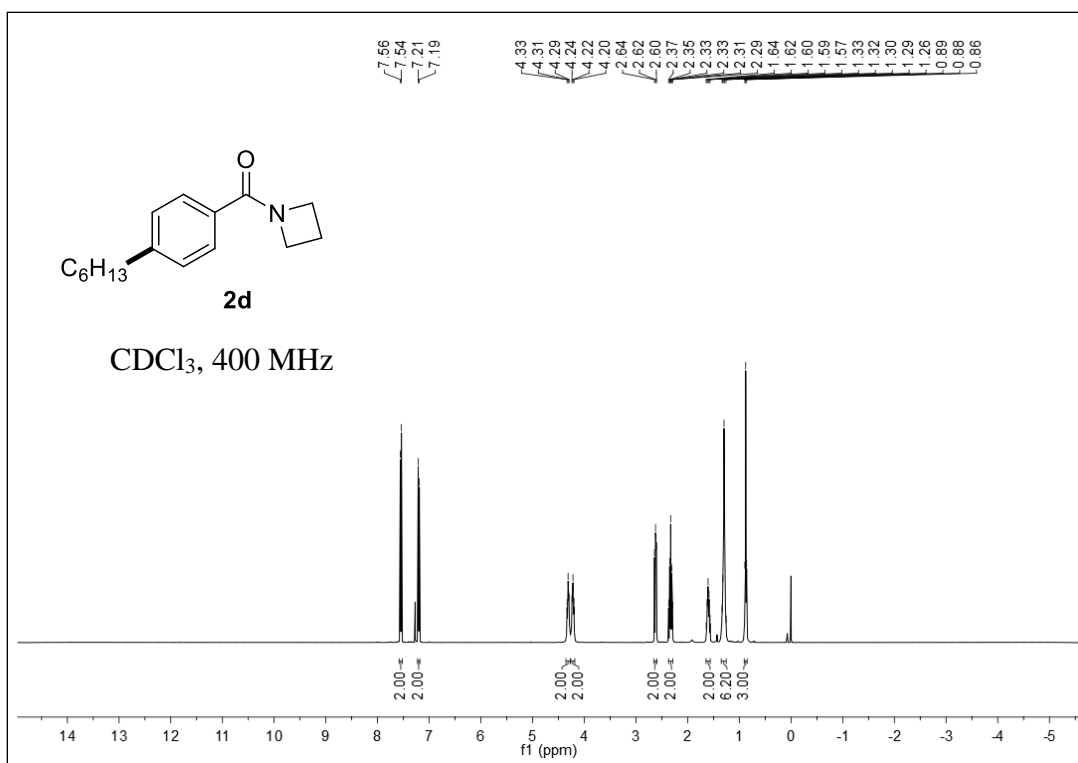

$^1\text{H}$  NMR (400 MHz,  $\text{CDCl}_3$ )  $\delta$  7.55 (d,  $J = 8.3$  Hz, 2H), 7.20 (d,  $J = 8.4$  Hz, 2H), 4.31 (t,  $J = 7.5$  Hz, 2H), 4.22 (t,  $J = 7.7$  Hz, 2H), 2.62 (t,  $J = 7.7$  Hz, 2H), 2.37–2.29 (m, 2H), 1.64–1.56 (m, 2H), 1.35–1.25 (m, 6H), 0.88 (t,  $J = 6.8$  Hz, 3H).

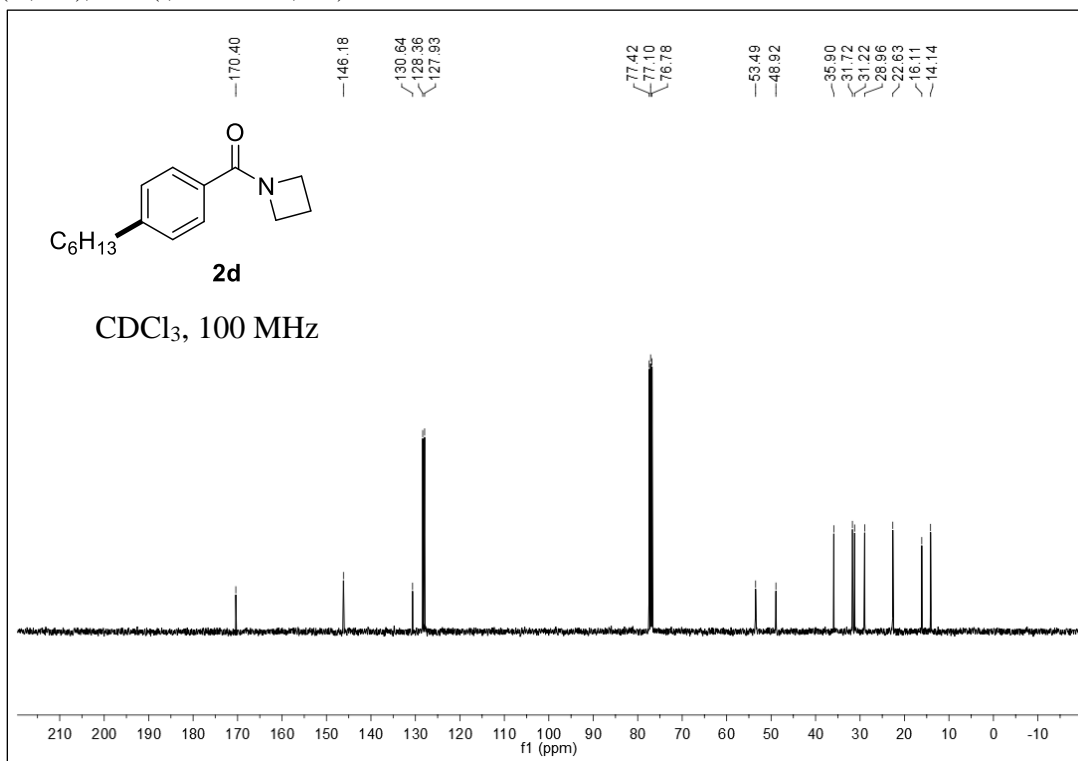

$^{13}\text{C}$  NMR (100 MHz,  $\text{CDCl}_3$ )  $\delta$  170.40, 146.18, 130.64, 128.36, 127.93, 77.42, 77.10, 76.78, 53.49, 48.92, 35.90, 31.72, 31.22, 28.96, 22.63, 16.11, 14.14.

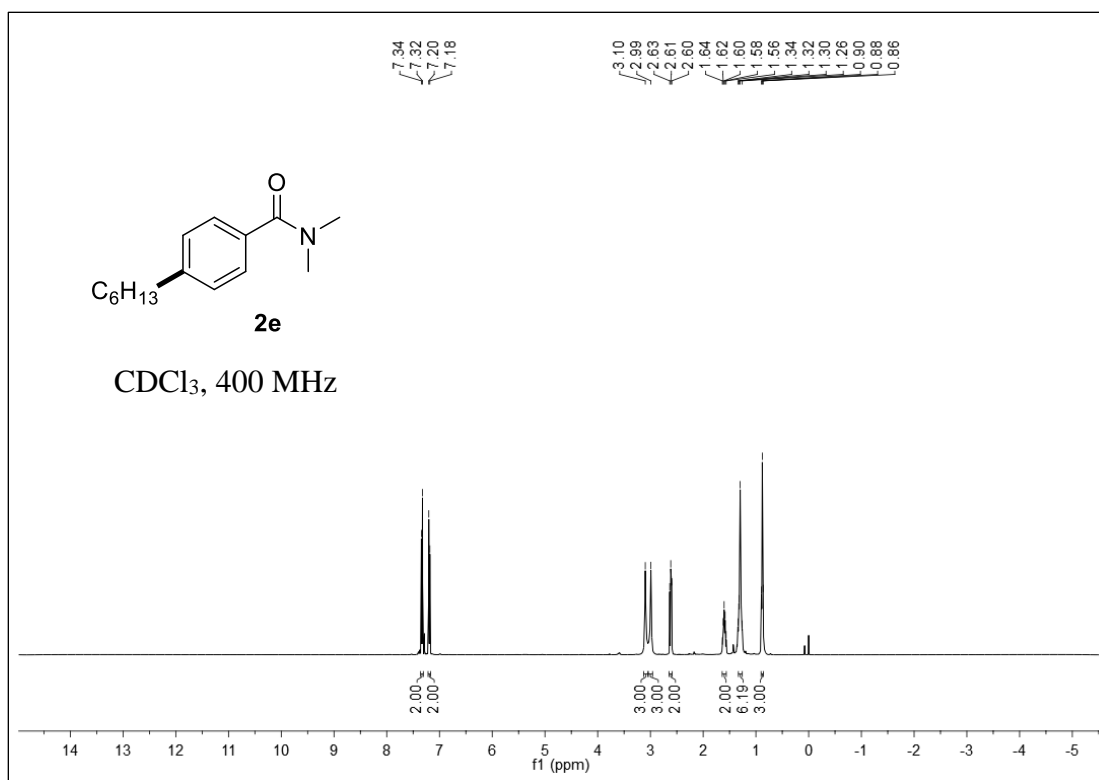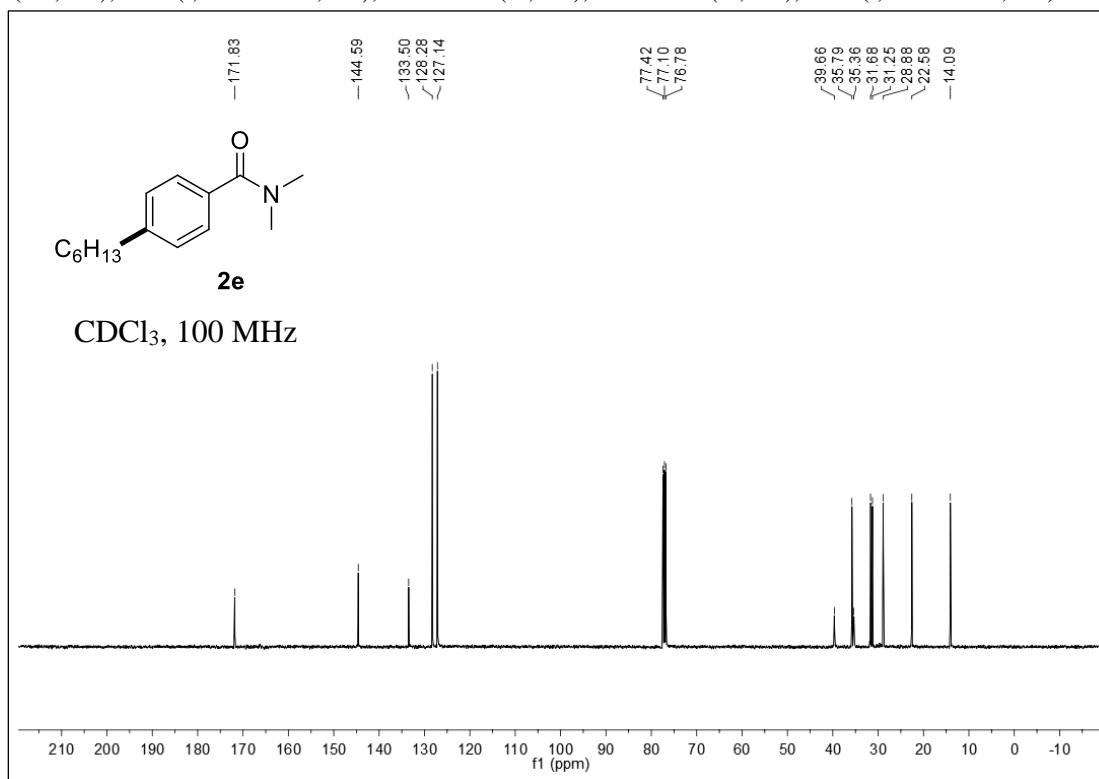

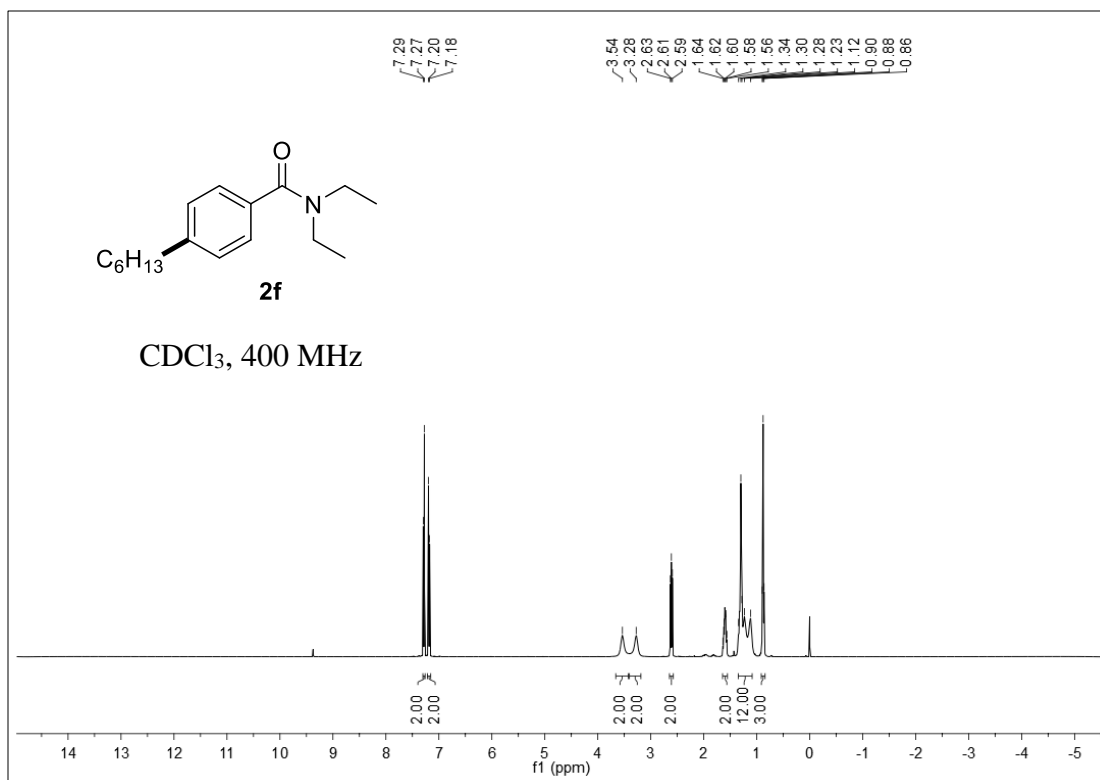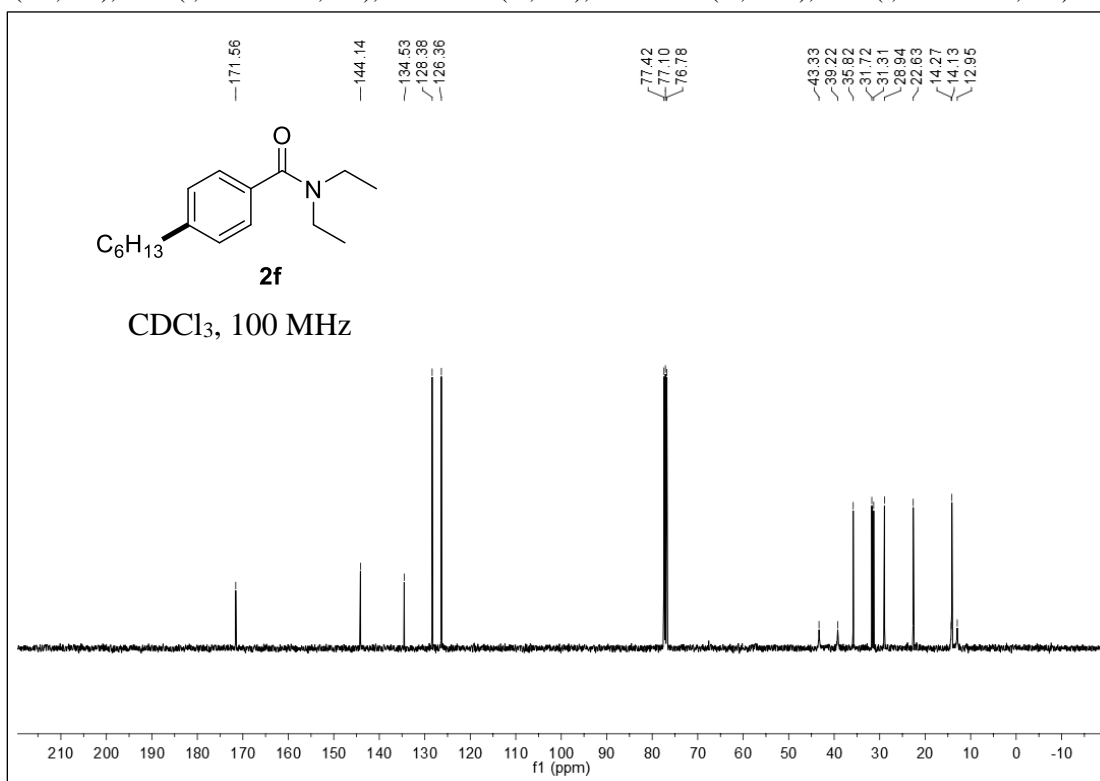

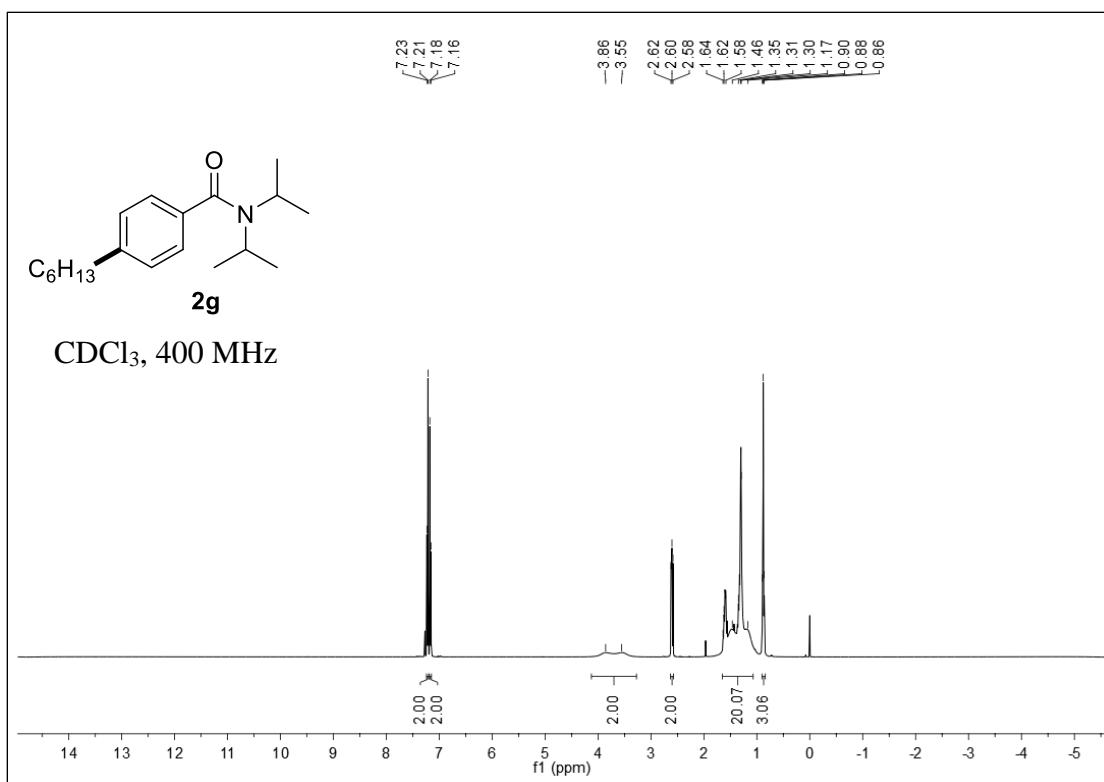

$^1\text{H}$  NMR (400 MHz,  $\text{CDCl}_3$ )  $\delta$  7.22 (d,  $J$  = 8.2 Hz, 2H), 7.17 (d,  $J$  = 8.3 Hz, 2H), 4.11–3.27 (m, 2H), 2.60 (t,  $J$  = 7.7 Hz, 2H), 1.65–1.07 (m, 20 H), 0.88 (t,  $J$  = 6.8 Hz, 3H).

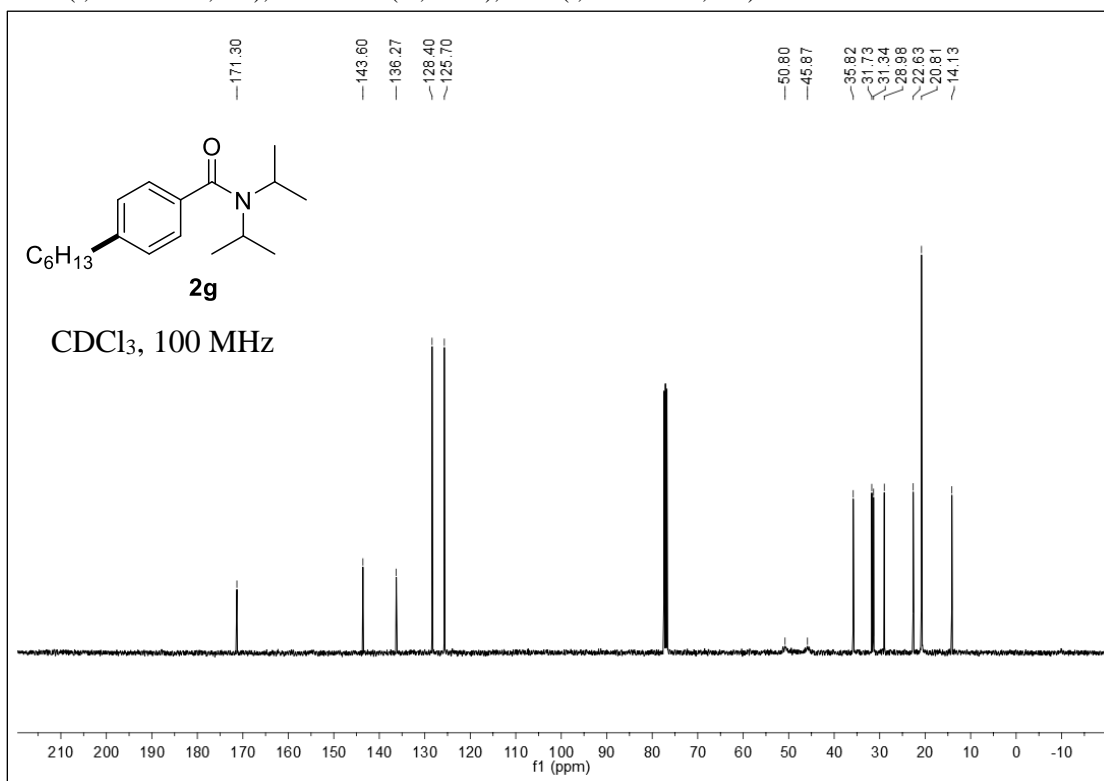

$^{13}\text{C}$  NMR (100 MHz,  $\text{CDCl}_3$ )  $\delta$  171.30, 143.60, 136.27, 128.40, 125.70, 50.80, 45.87, 35.82, 31.73, 31.34, 28.98, 22.63, 20.81, 14.13.



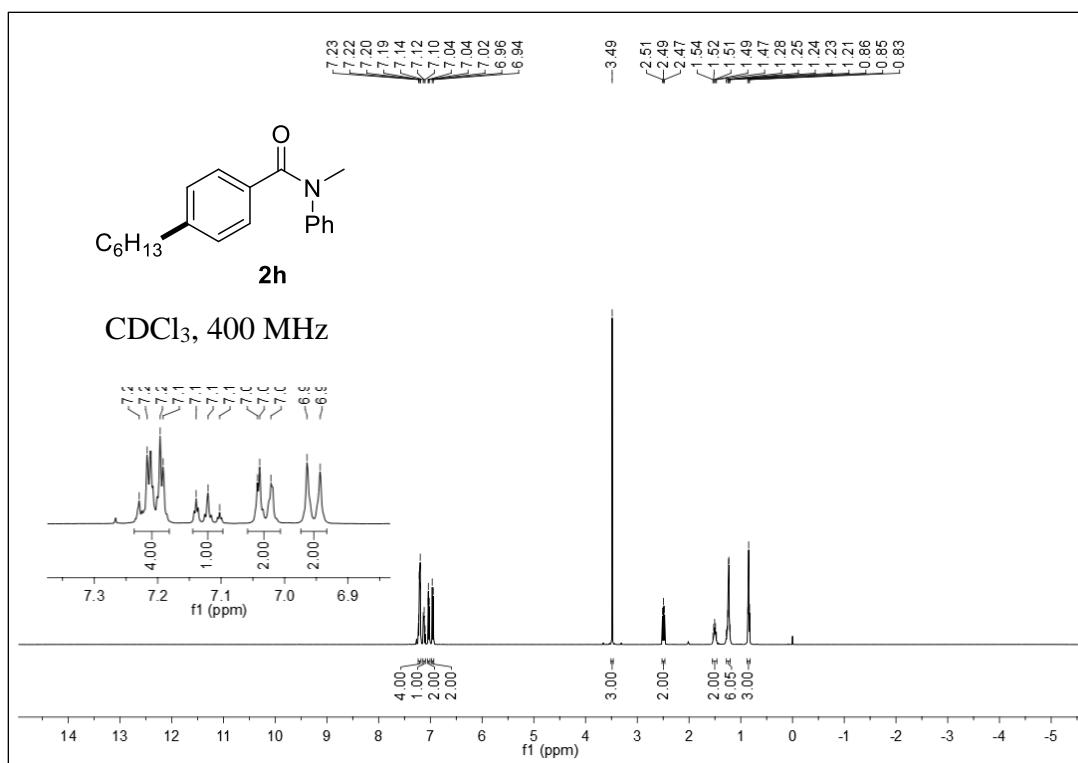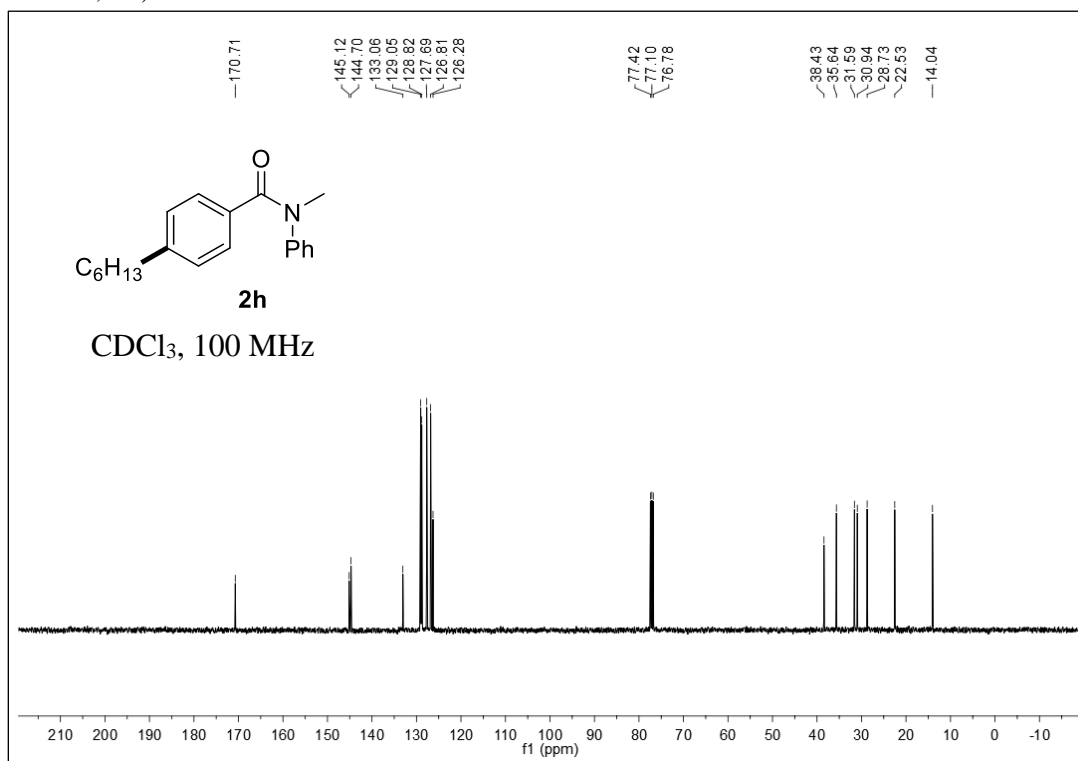

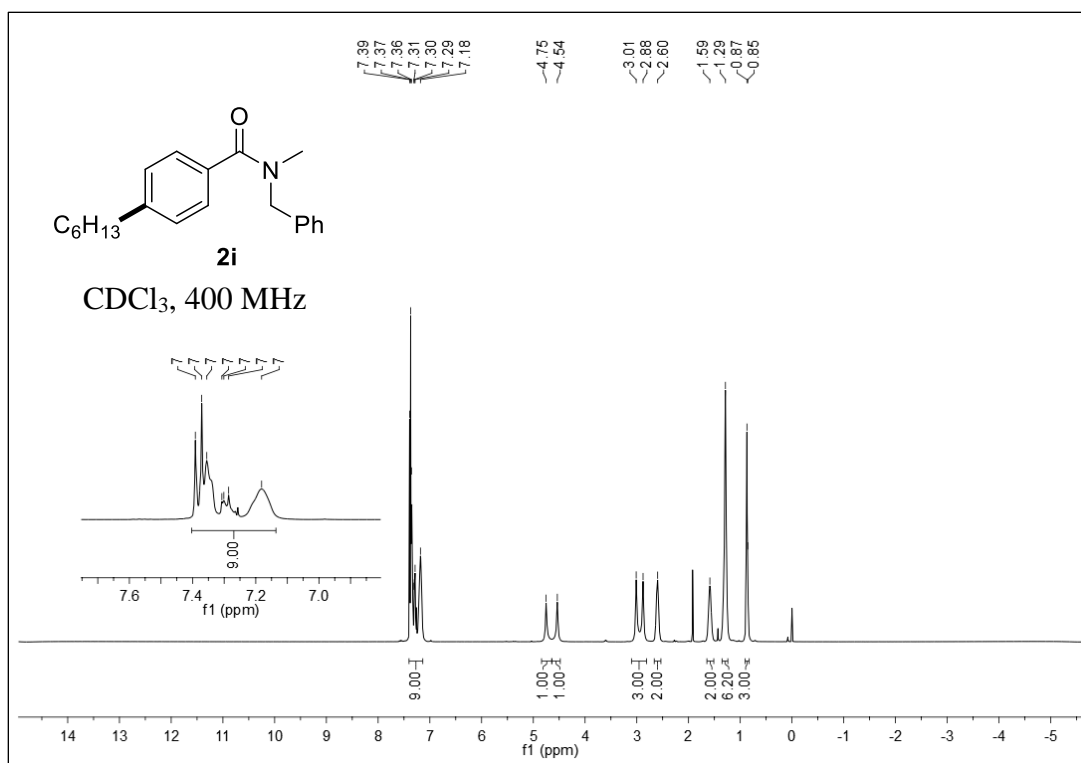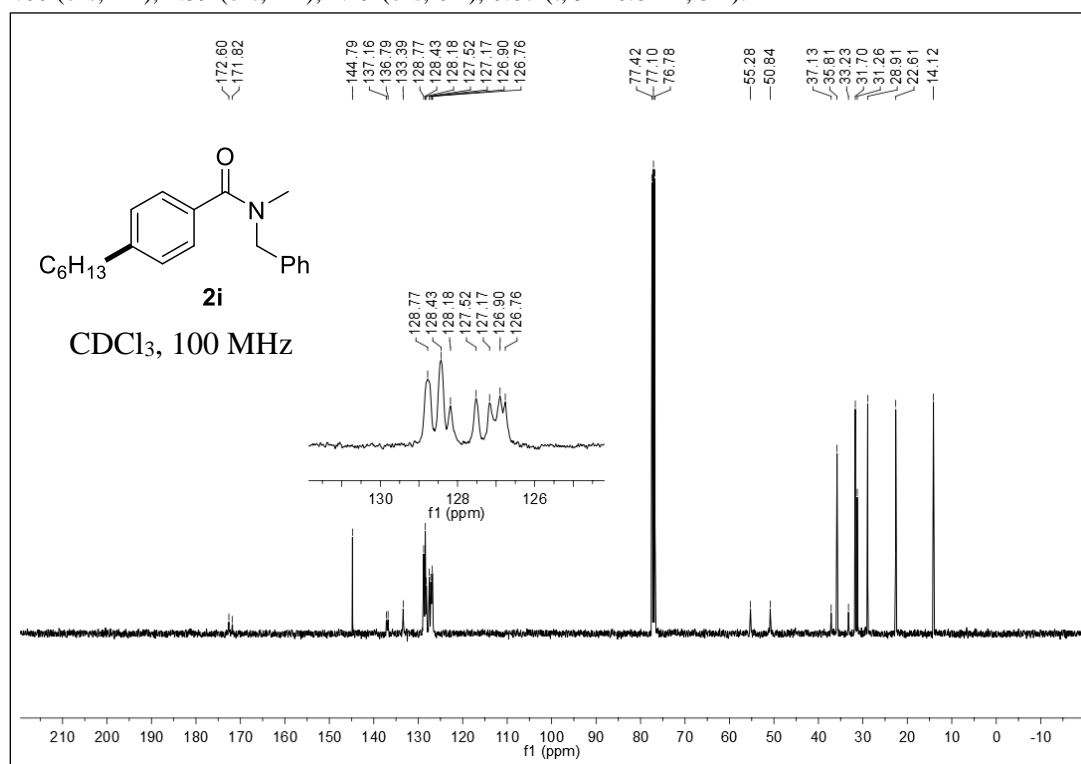

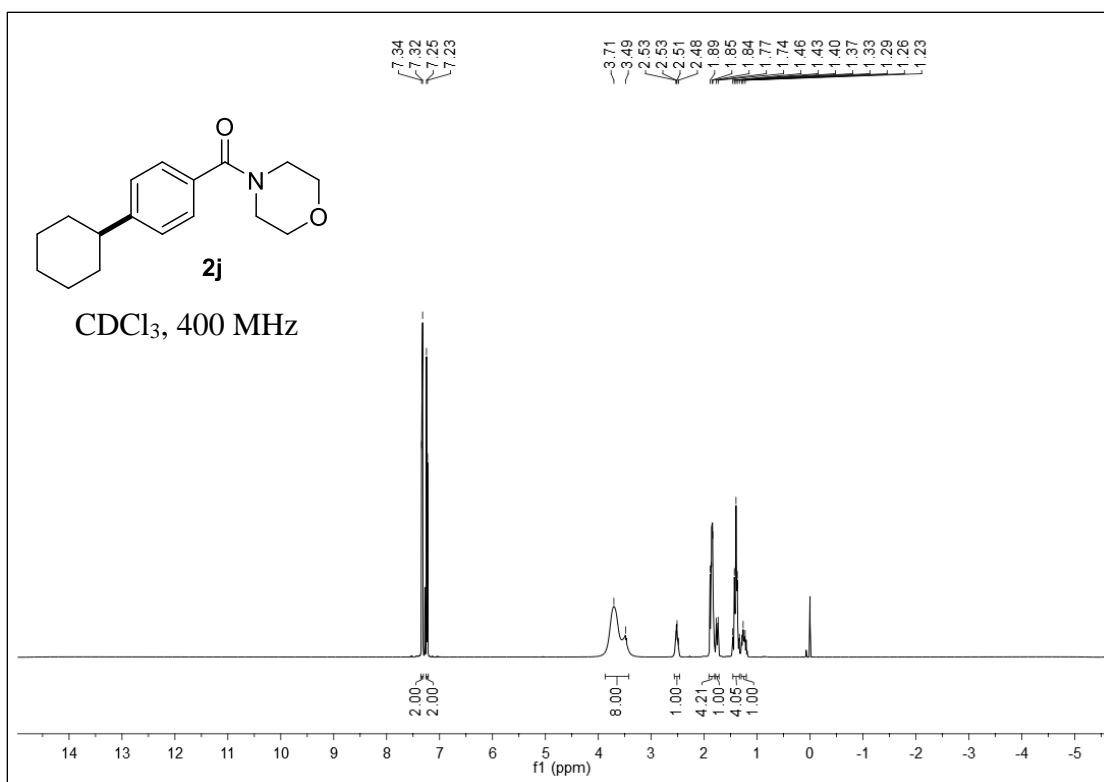

<sup>1</sup>H NMR (400 MHz, CDCl<sub>3</sub>) δ 7.33 (d, *J* = 8.3 Hz, 2H), 7.24 (d, *J* = 8.0 Hz, 2H), 3.89–3.40 (m, 8H), 2.58–2.46 (m, 1H), 1.92–1.80 (m, 4H), 1.80–1.71 (m, 1H), 1.48–1.32 (m, 4H), 1.32–1.17 (m, 1H).

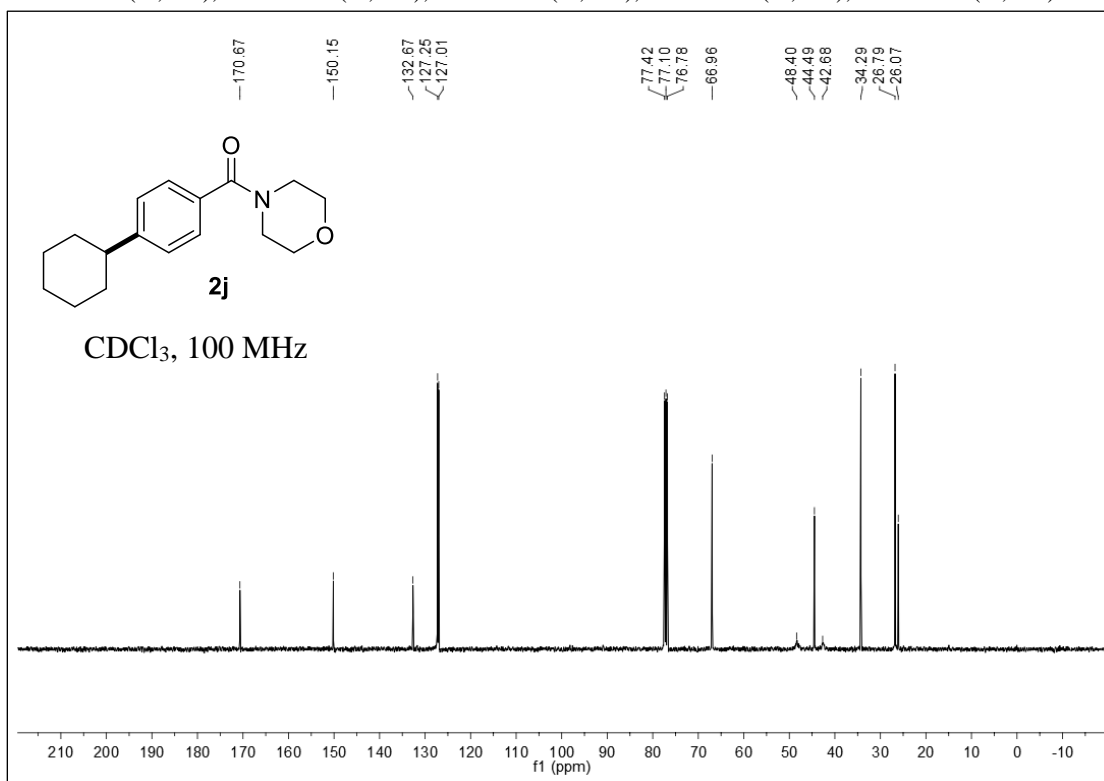

<sup>13</sup>C NMR (100 MHz, CDCl<sub>3</sub>) δ 170.67, 150.15, 132.67, 127.25, 127.01, 77.42, 77.10, 76.78, 66.96, 48.40, 44.49, 42.68, 34.29, 26.79, 26.07.

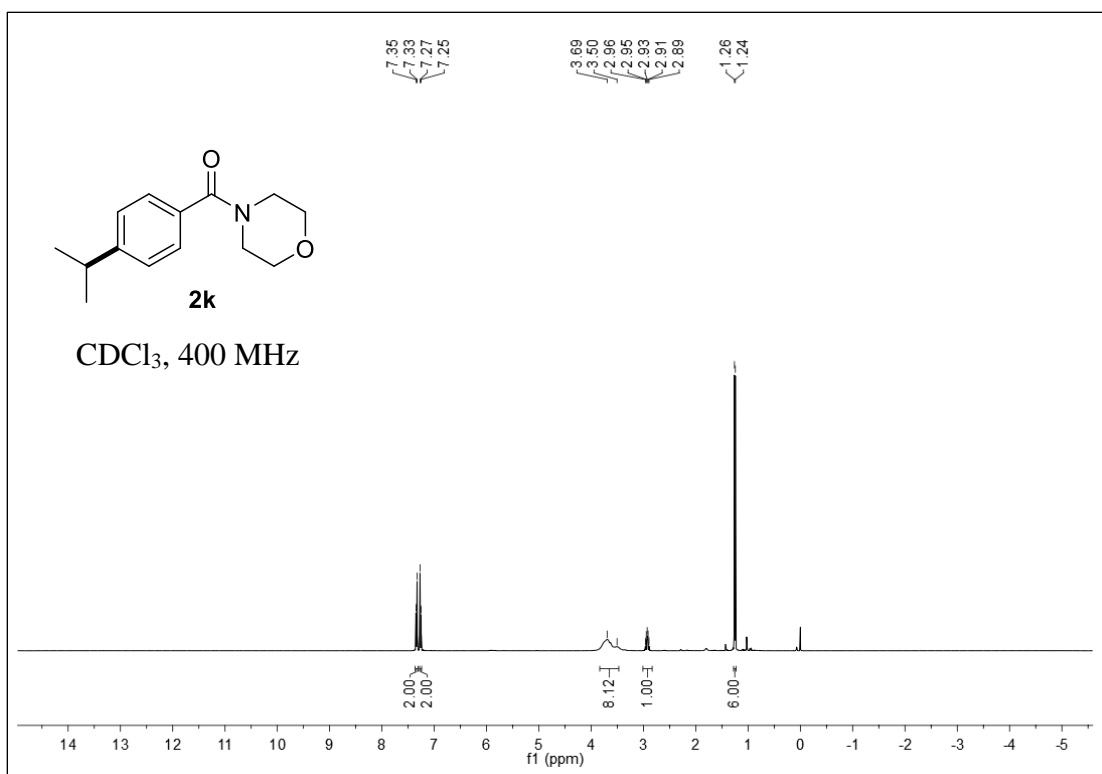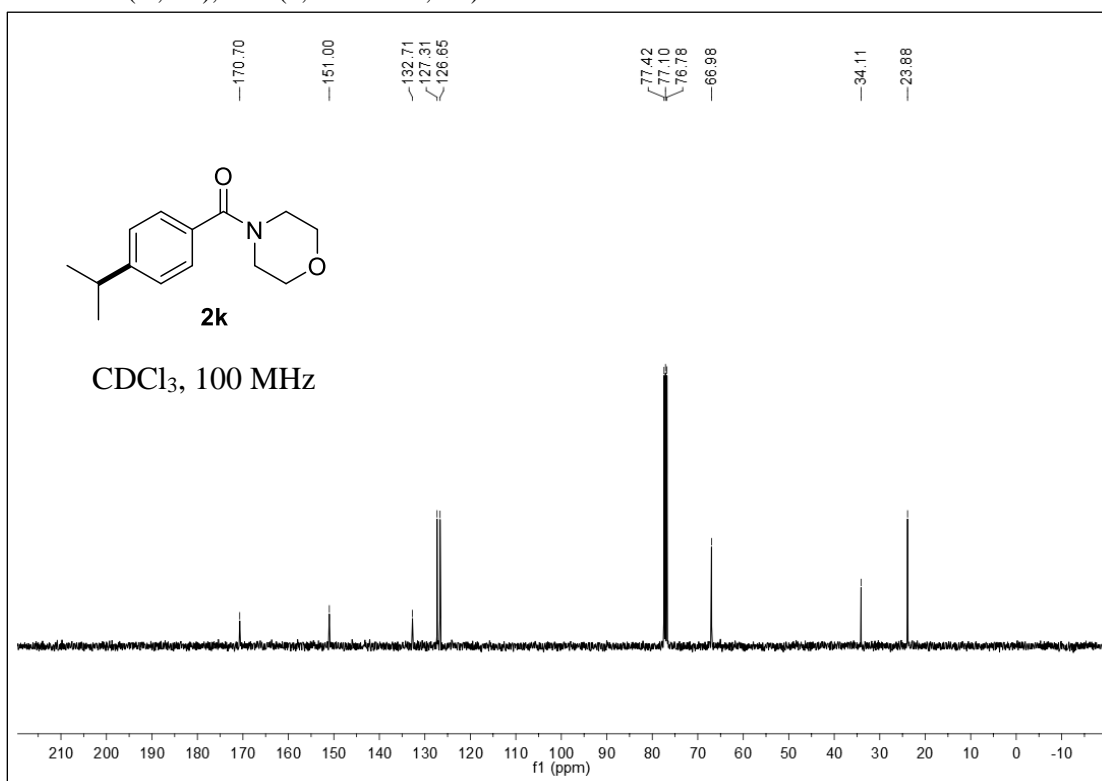

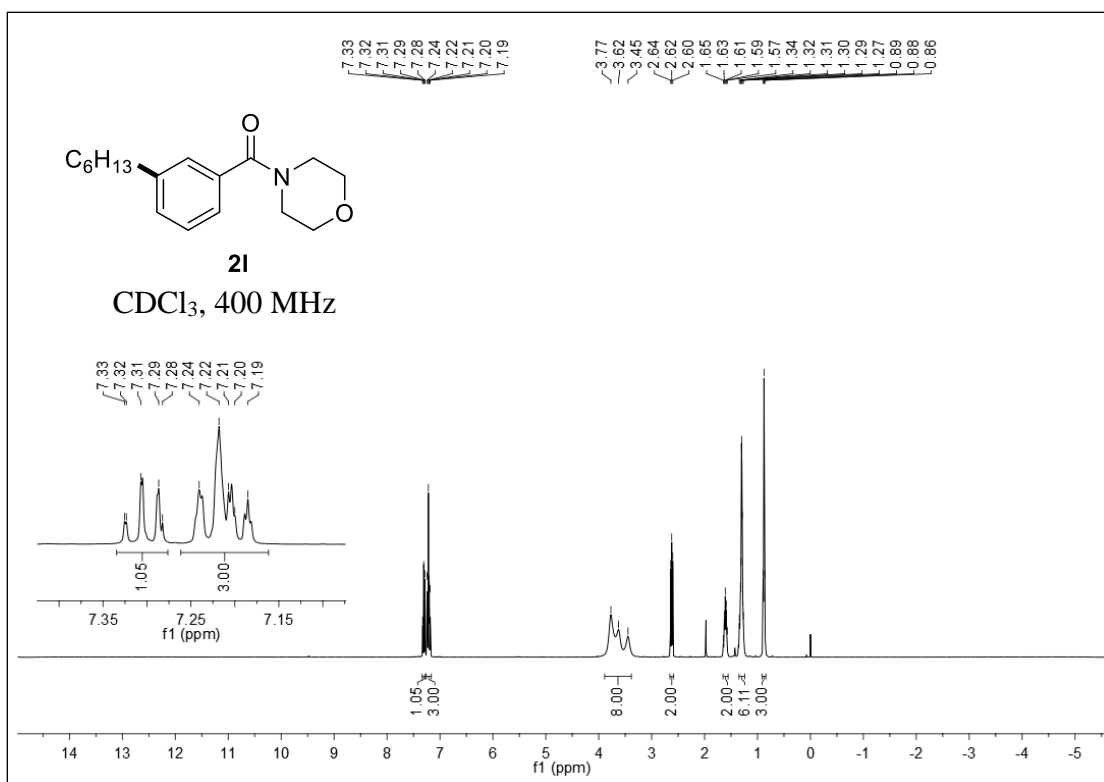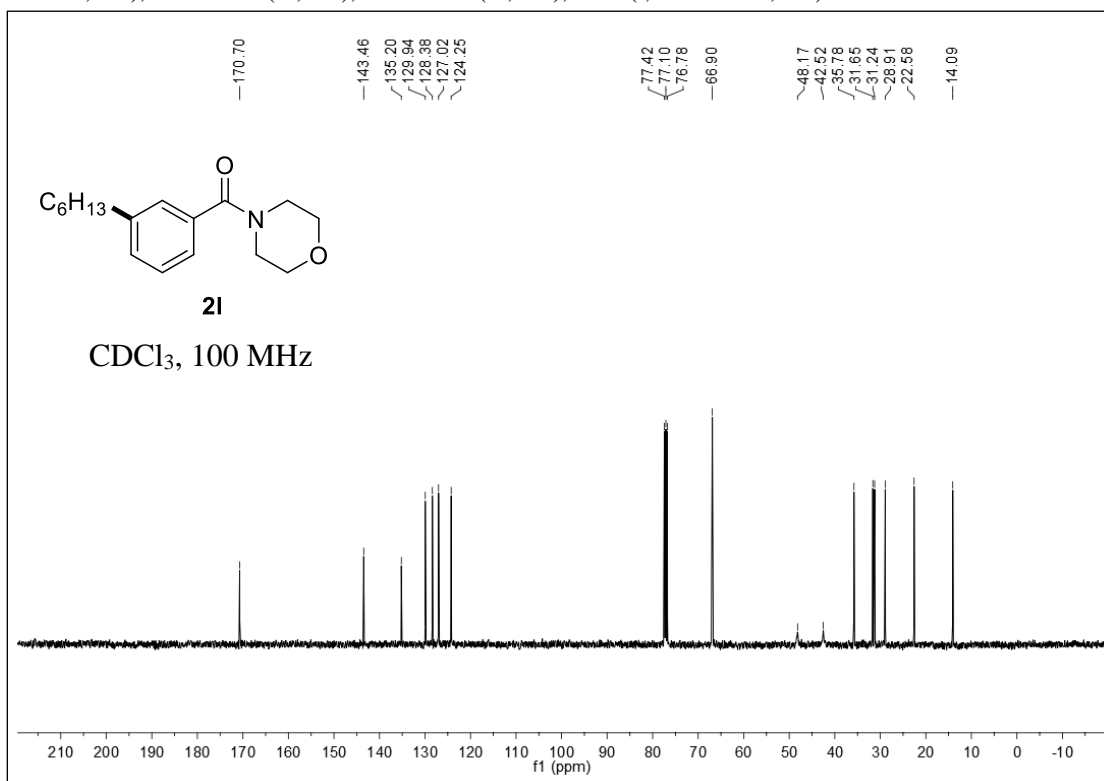

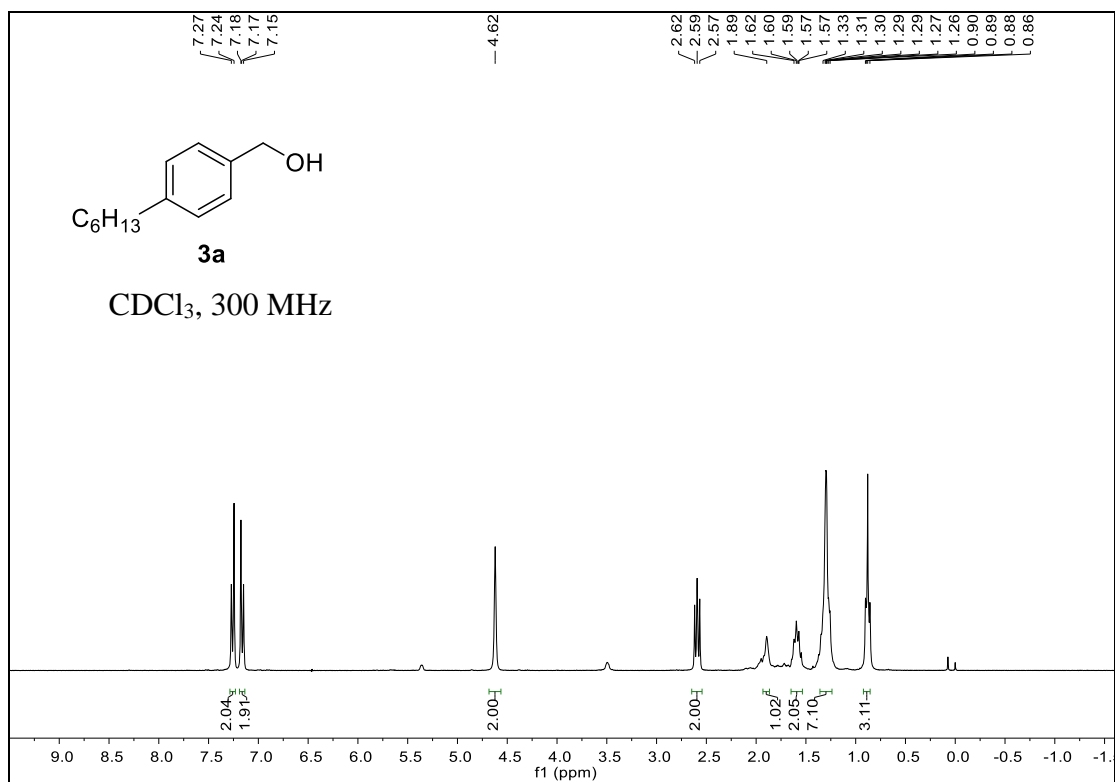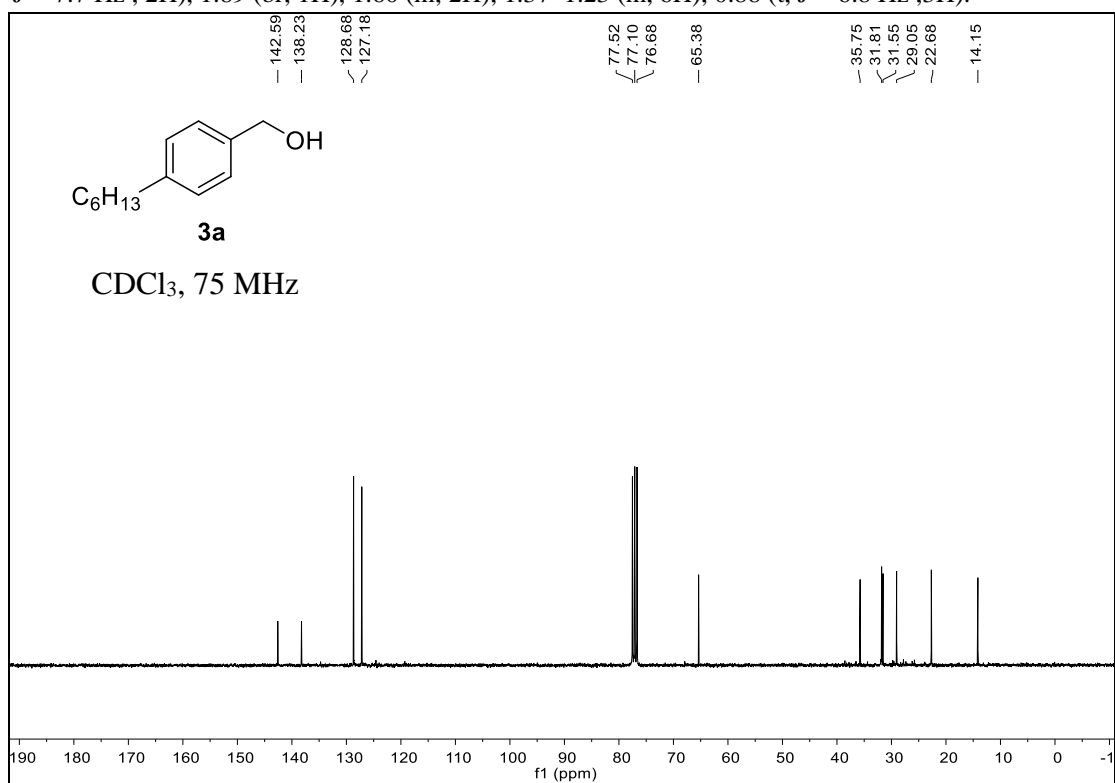

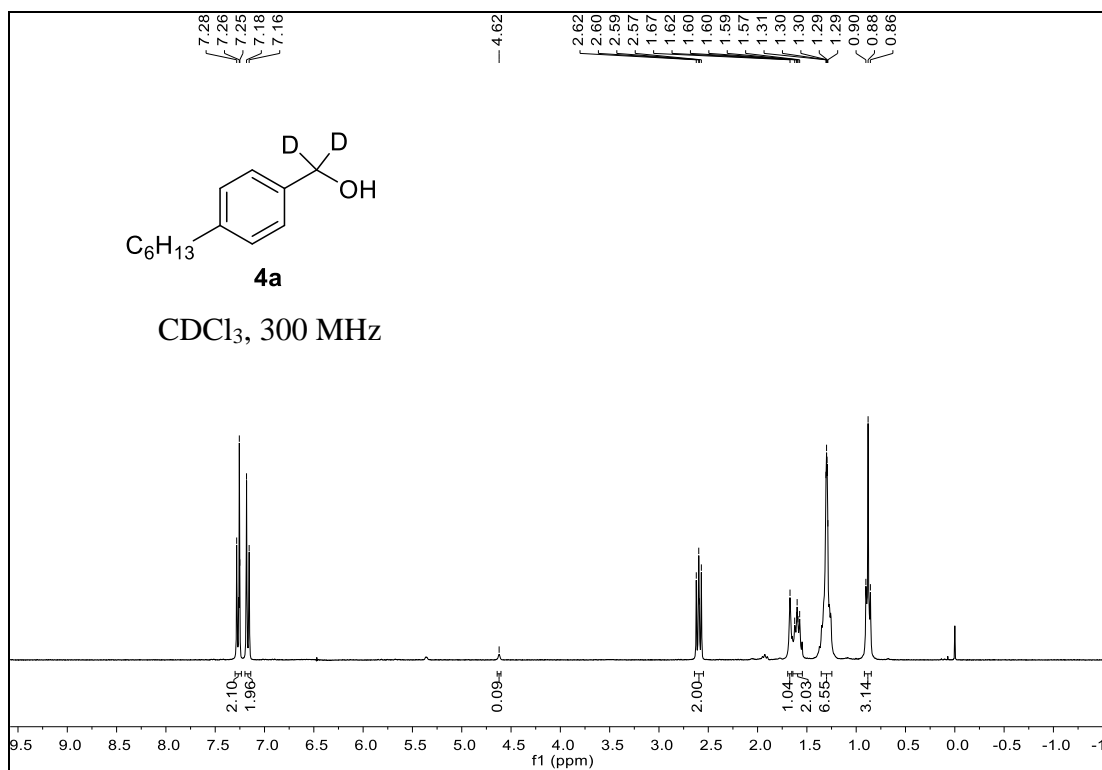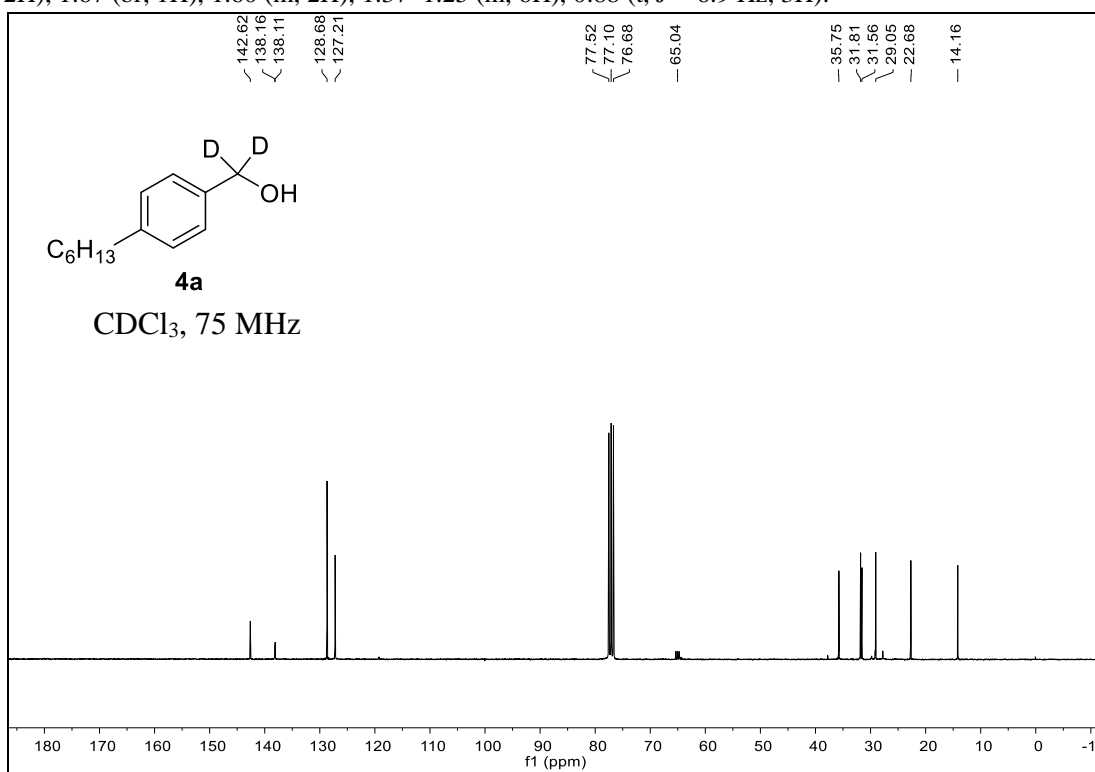

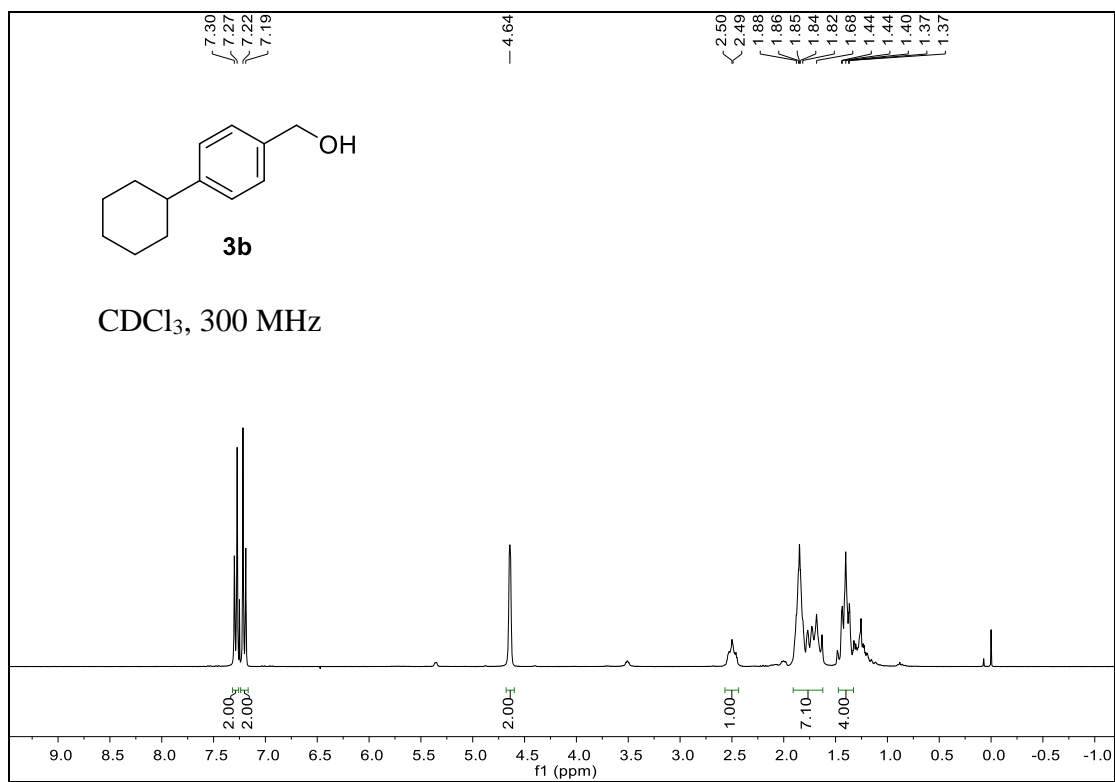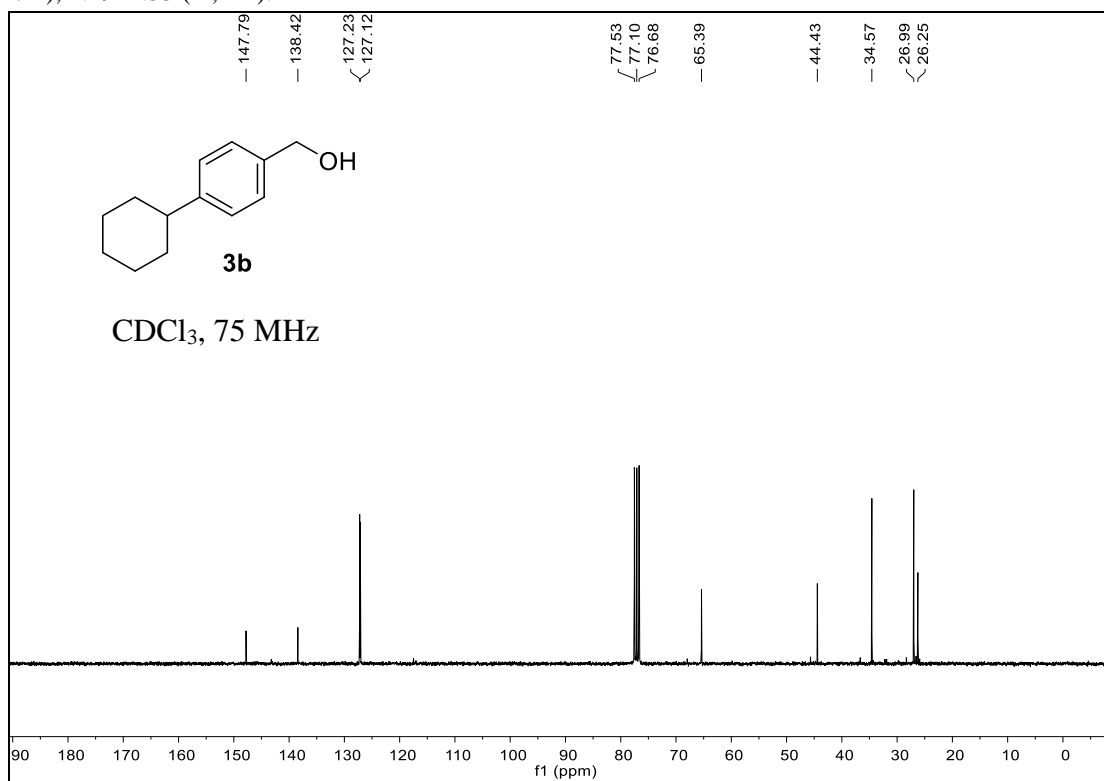



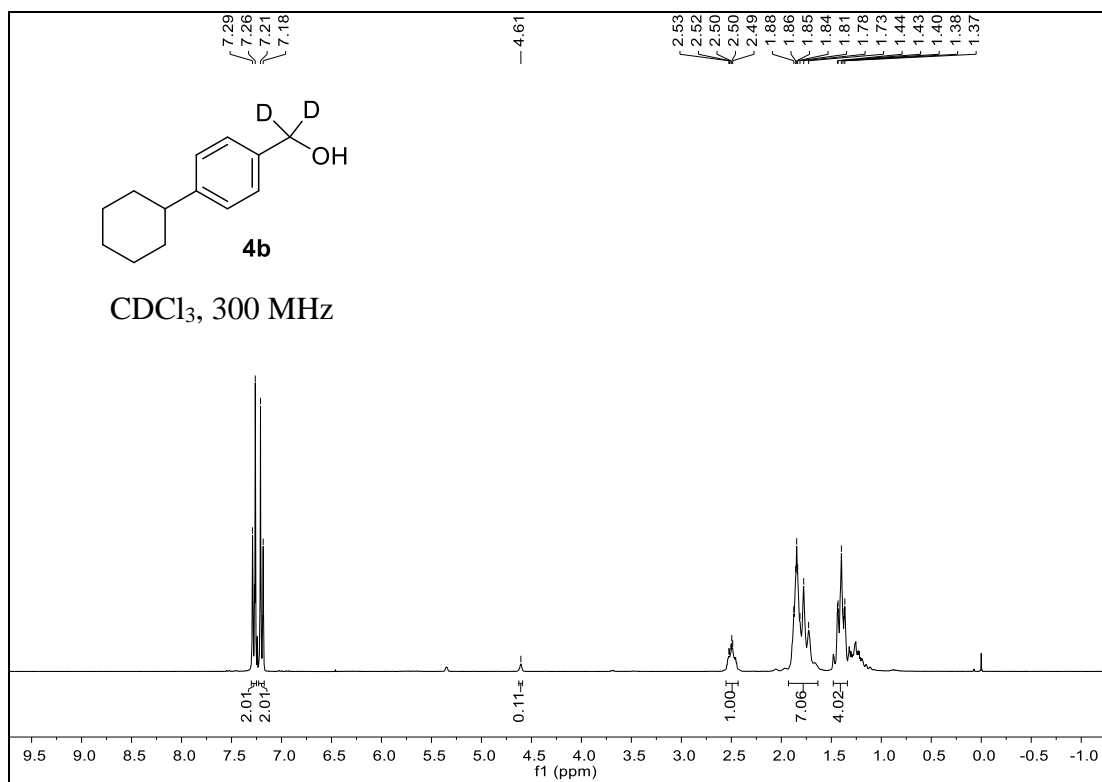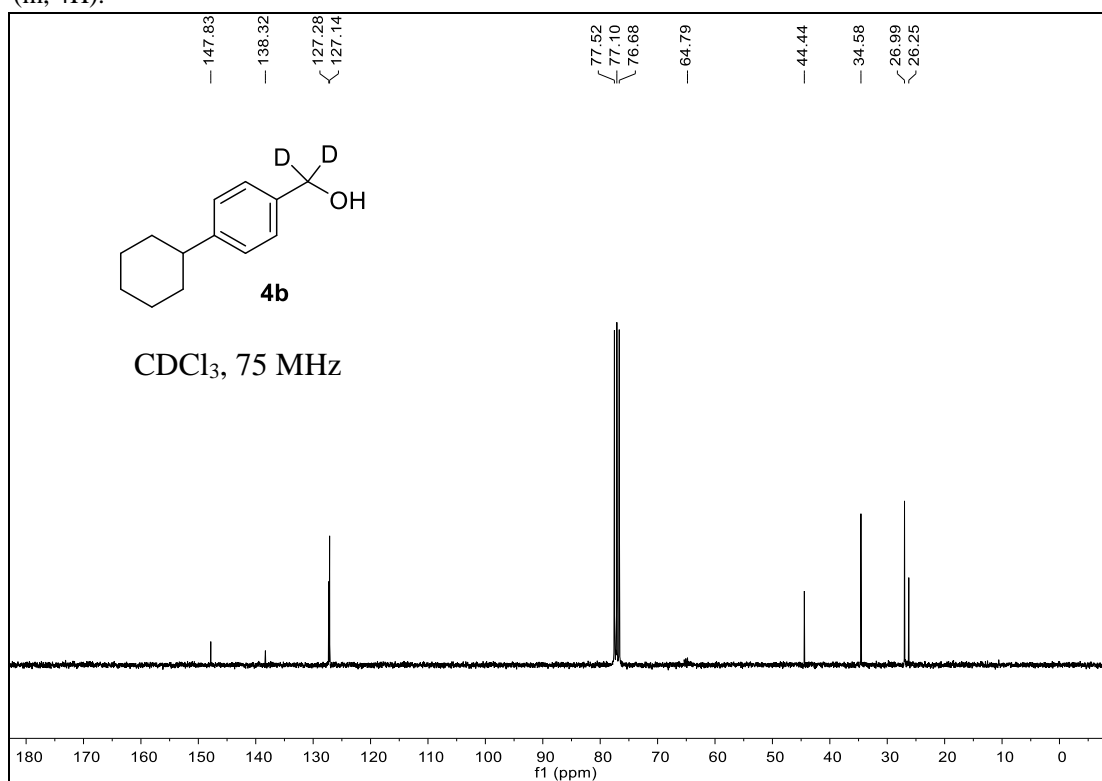

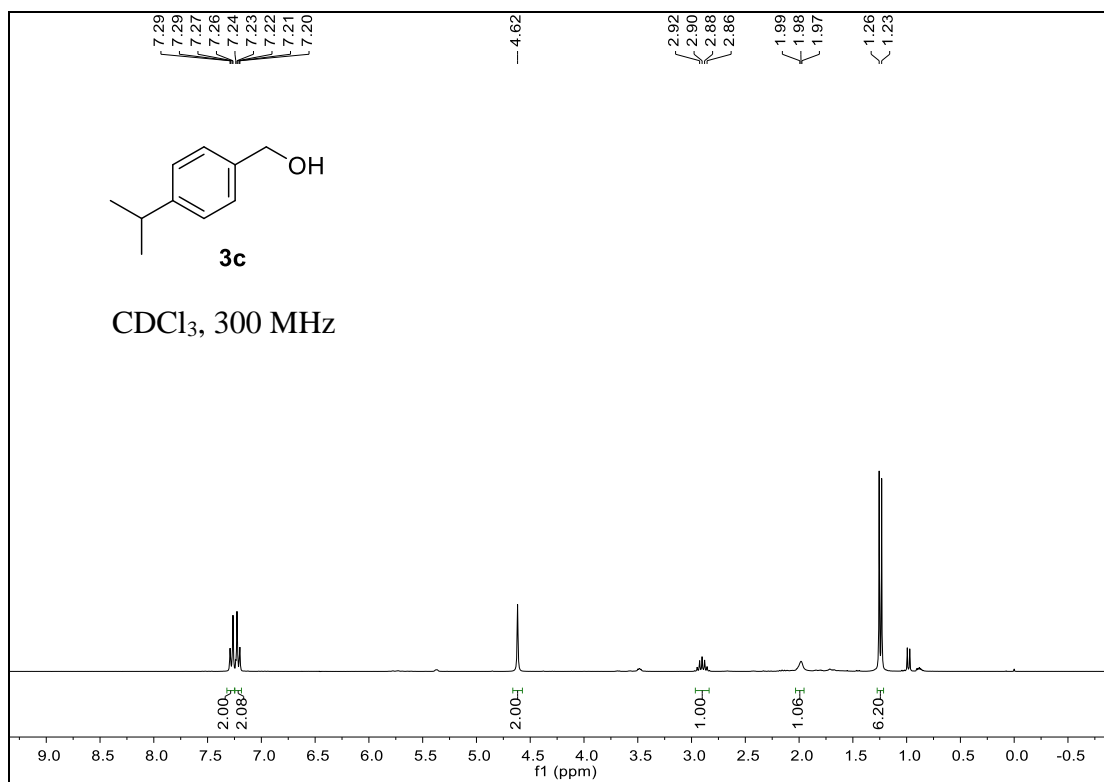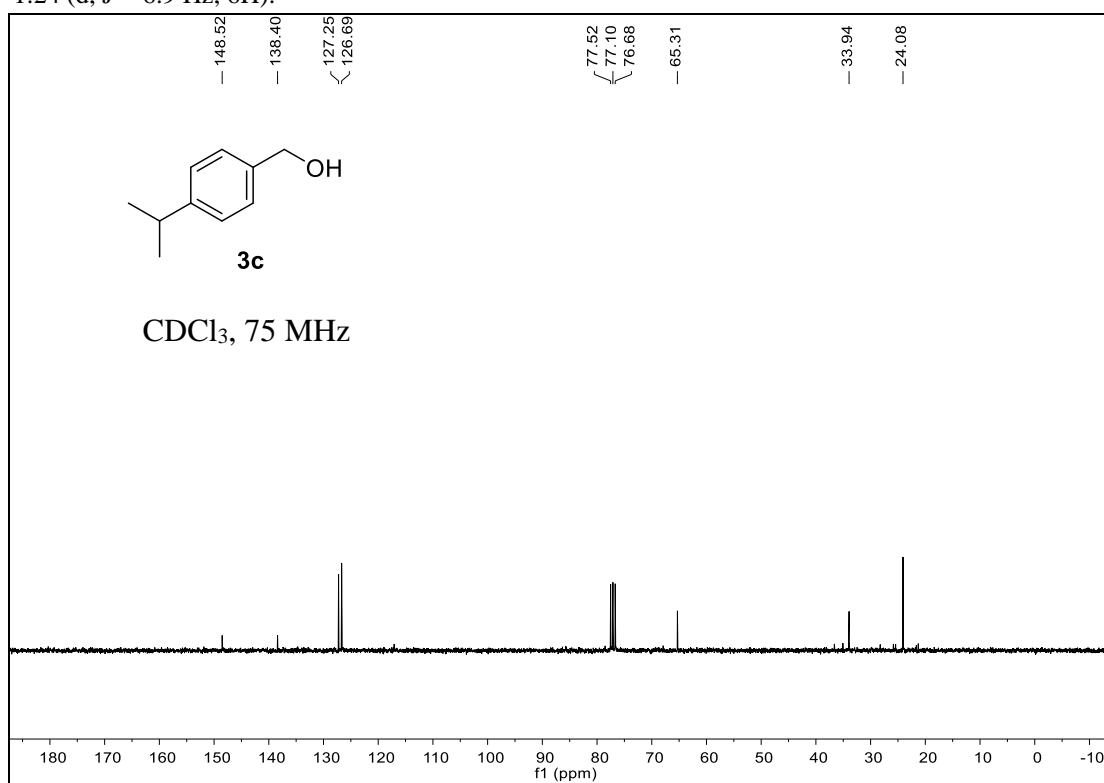

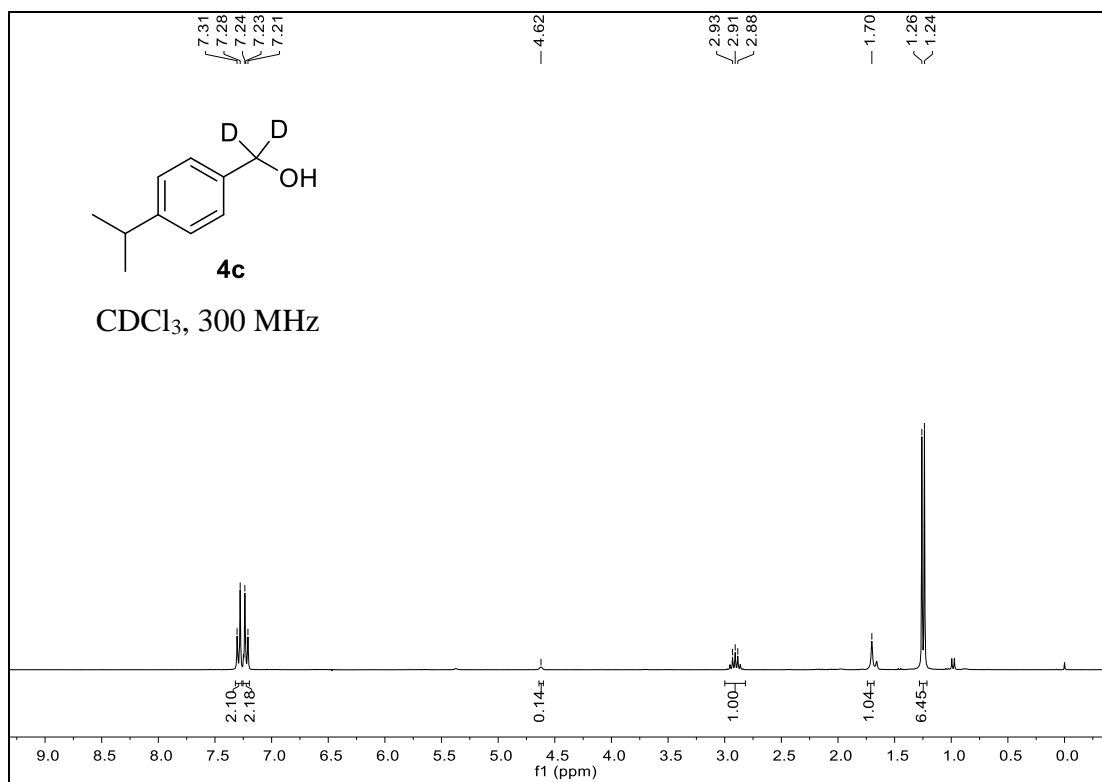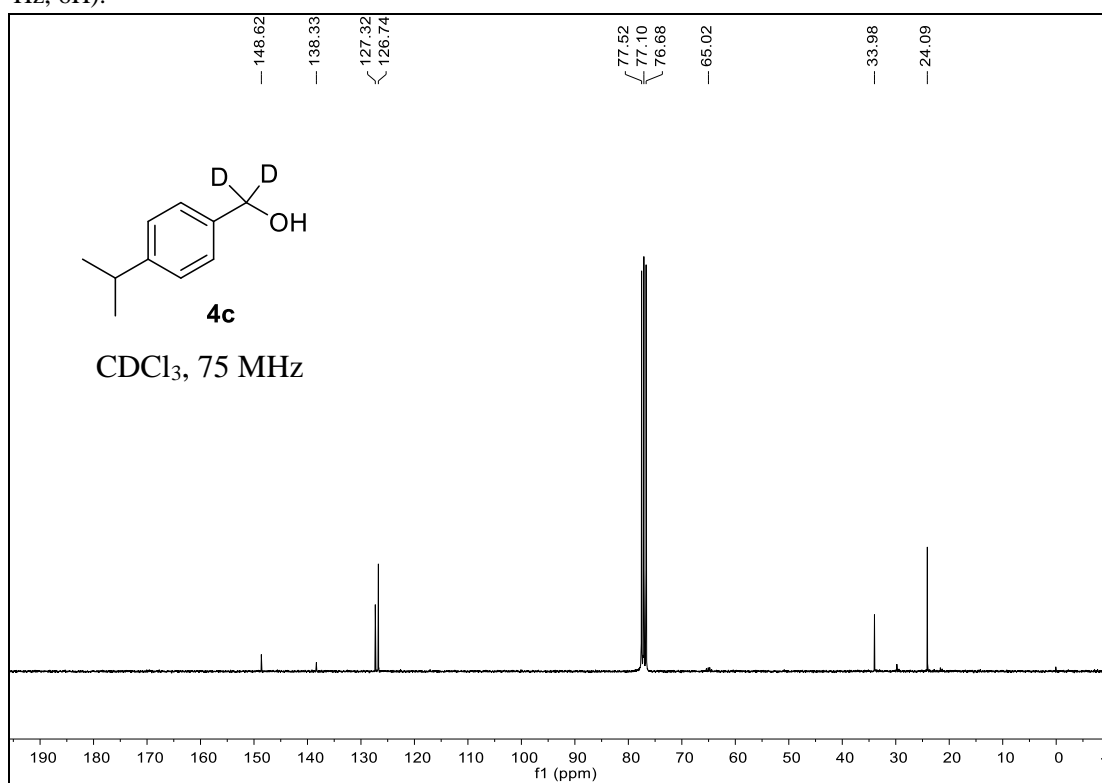

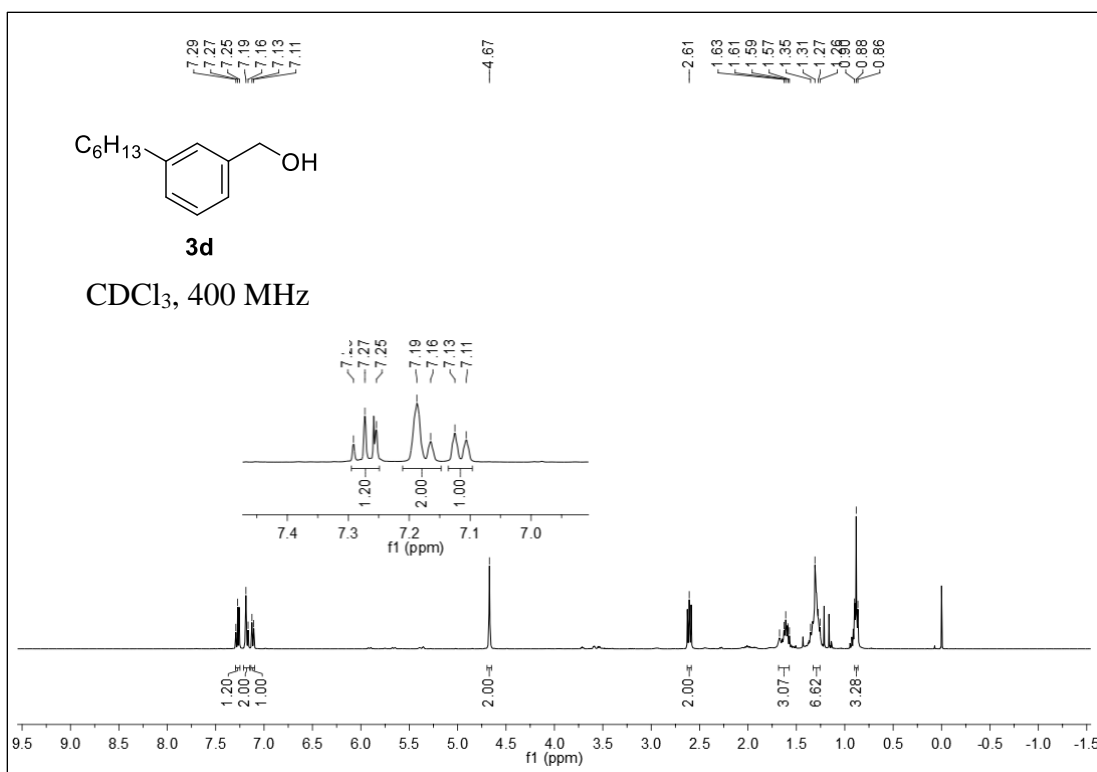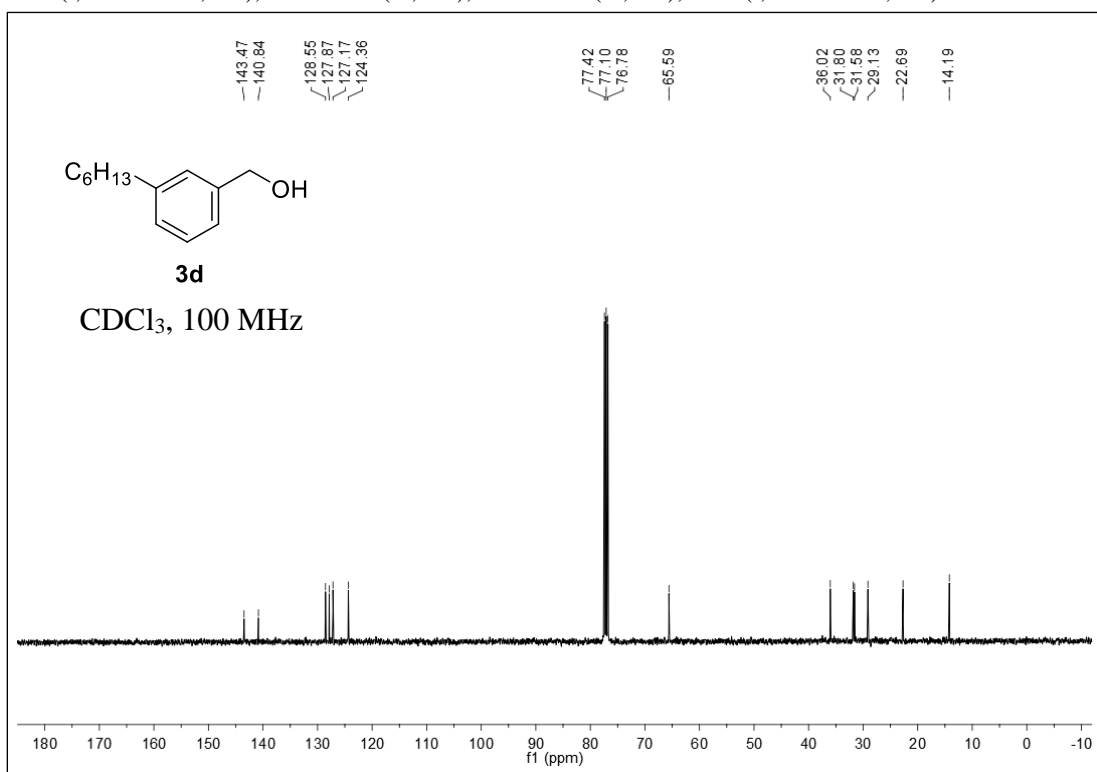

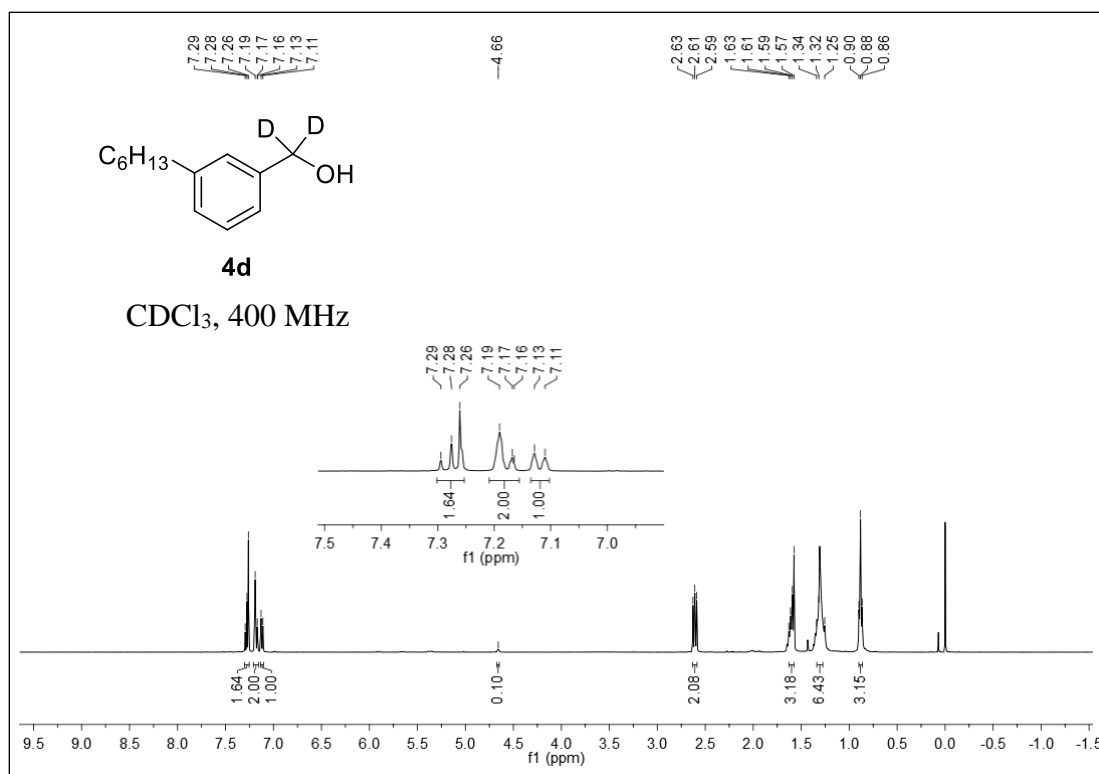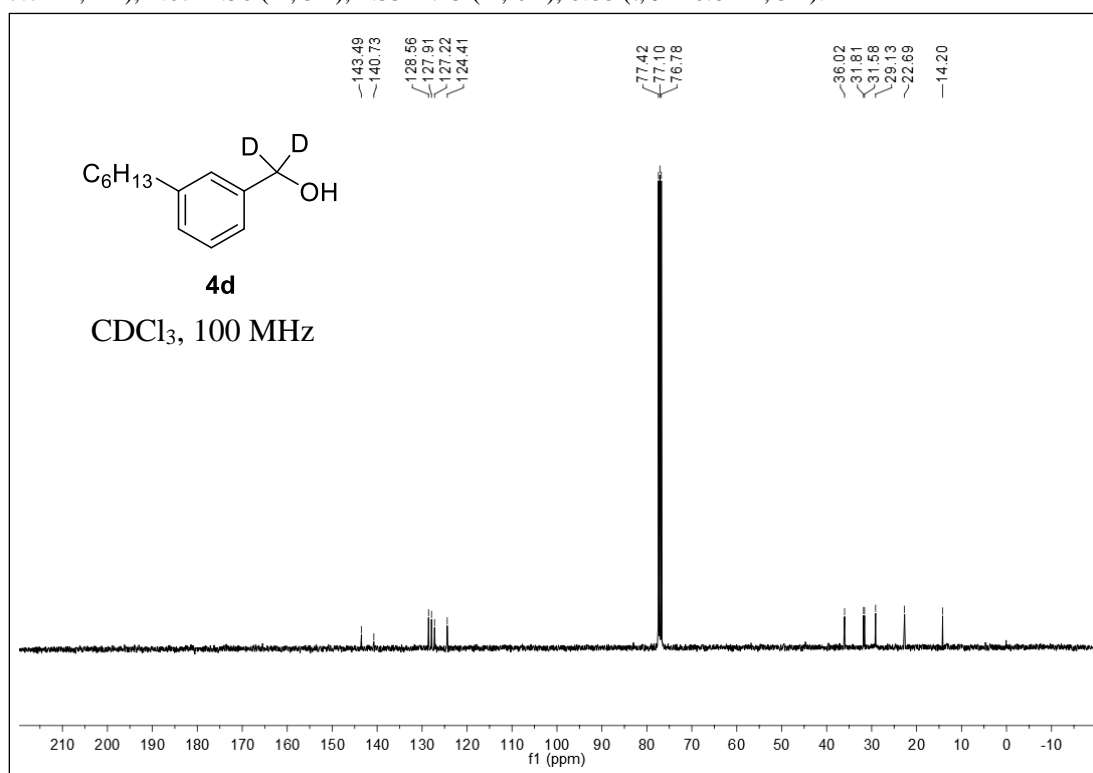

Supplement: s1 [file s1]
